# Supplementary material for: Brain-movement relationship during upper-limb functional movements in chronic post-stroke patients
Source: PubMed Central journal article supplement (PMC11494975; doi:10.1186/s12984-024-01461-3), 2024-10-22
Supplement: 12984_2024_1461_MOESM2_ESM.pdf [file 12984_2024_1461_MOESM2_ESM.pdf]

**Additional file 2.** Statistical results of the ANOVA on the fEEG and fNIRS brain parameters for the circular steering task.

| <b>A.</b>    | <b>GROUP</b>              | <b>HEMISPHERE</b>                            | <b>HAND</b>                                  |                                              |
|--------------|---------------------------|----------------------------------------------|----------------------------------------------|----------------------------------------------|
| <i>fEEG</i>  |                           |                                              |                                              |                                              |
|              | Alpha ERD                 | F (1, 27) = 0.66, p = .424, $\eta^2_p = .02$ | F (1, 27) = 1.45, p = .293, $\eta^2_p = .04$ | F (1, 27) = 0.42, p = .523, $\eta^2_p = .01$ |
|              | Beta ERD                  | F (1, 27) = 0.08, p = .780, $\eta^2_p = .00$ | F (1, 27) = 0.21, p = .654, $\eta^2_p = .01$ | F (1, 27) = 0.40, p = .534, $\eta^2_p = .01$ |
|              | Alpha ERS                 | F (1, 25) = 1.28, p = .269, $\eta^2_p = .05$ | F (1, 25) = 0.00, p = .956, $\eta^2_p = .00$ | F (1, 25) = 2.76, p = .109, $\eta^2_p = .09$ |
|              | Beta ERS                  | F (1, 25) = 0.15, p = .698, $\eta^2_p = .01$ | F (1, 25) = 0.00, p = .996, $\eta^2_p = .00$ | F (1, 25) = 2.45, p = .127, $\eta^2_p = .09$ |
| <i>fNIRS</i> |                           |                                              |                                              |                                              |
|              | $\Delta\text{HbO}_2$ peak | F (1, 31) = 0.00, p = .967, $\eta^2_p = .00$ | F (1, 31) = 0.20, p = .659, $\eta^2_p = .00$ | F (1, 31) = 0.45, p = .506, $\eta^2_p = .01$ |
| <b>B.</b>    | <b>GROUP x HEMISPHERE</b> | <b>GROUP x HAND</b>                          | <b>HAND x HEMISPHERE</b>                     |                                              |
| <i>fEEG</i>  |                           |                                              |                                              |                                              |
|              | Alpha ERD                 | F (1, 27) = 0.00, p = .999, $\eta^2_p = .00$ | F (1, 27) = 1.04, p = .317, $\eta^2_p = .04$ | F (1, 27) = 1.78, p = .193, $\eta^2_p = .06$ |
|              | Beta ERD                  | F (1, 27) = 0.56, p = .461, $\eta^2_p = .02$ | F (1, 27) = 0.90, p = .351, $\eta^2_p = .03$ | F (1, 27) = 0.25, p = .619, $\eta^2_p = .01$ |
|              | Alpha ERS                 | F (1, 25) = 0.26, p = .614, $\eta^2_p = .01$ | F (1, 25) = 0.00, p = .961, $\eta^2_p = .00$ | F (1, 25) = 0.07, p = .792, $\eta^2_p = .00$ |
|              | Beta ERS                  | F (1, 25) = 0.03, p = .868, $\eta^2_p = .00$ | F (1, 25) = 0.00, p = .924, $\eta^2_p = .00$ | F (1, 25) = 1.42, p = .244, $\eta^2_p = .05$ |
| <i>fNIRS</i> |                           |                                              |                                              |                                              |
|              | $\Delta\text{HbO}_2$ peak | F (1, 31) = 0.07, p = .791, $\eta^2_p = .02$ | F (1, 31) = 1.40, p = .246, $\eta^2_p = .04$ | F (1, 31) = 3.52, p = .070, $\eta^2_p = .10$ |

**A.** Effects of Group (Old healthy vs Stroke), Hemisphere (Contralateral vs Ipsilateral) and Hand (Dominant / Non-paretic vs Non-dominant / Paretic) on the fNIRS and fEEG parameters on the circular steering task and **B.** Two levels interactions of the model. In bold, results with  $p < .05$  and  $\eta^2_p > .0$
