# Supplementary material for: Brain-movement relationship during upper-limb functional movements in chronic post-stroke patients
Source: PubMed Central journal article supplement (PMC11494975; doi:10.1186/s12984-024-01461-3), 2024-10-22
Supplement: 12984_2024_1461_MOESM3_ESM.pdf [file 12984_2024_1461_MOESM3_ESM.pdf]

**Additional file 3.** Statistical results of the ANOVA on the fEEG and fNIRS brain parameters for the paced-reaching task.

| <b>A.</b>    | <b>GROUP</b>              | <b>HEMISPHERE</b>                                              | <b>HAND</b>                                                     | <b>CONDITION</b>                             |                                                                |
|--------------|---------------------------|----------------------------------------------------------------|-----------------------------------------------------------------|----------------------------------------------|----------------------------------------------------------------|
| <i>fEEG</i>  |                           |                                                                |                                                                 |                                              |                                                                |
|              | Alpha ERD                 | F (1, 23) = 0.00, p = .997, $\eta^2_p = .00$                   | F (1, 23) = 0.08, p = .770, $\eta^2_p = .00$                    | F (1, 23) = 0.29, p = .145, $\eta^2_p = .09$ | F (1, 23) = 0.49, p = .492, $\eta^2_p = .02$                   |
|              | Beta ERD                  | F (1, 23) = 2.81, p = .107, $\eta^2_p = .11$                   | F (1, 23) = 0.02, p = .896, $\eta^2_p = .00$                    | F (1, 23) = 0.01, p = .922, $\eta^2_p = .00$ | F (1, 23) = 0.12, p = .734, $\eta^2_p = .01$                   |
|              | Alpha ERS                 | <b>F (1, 16) = 8.62, p = .010, <math>\eta^2_p = .35</math></b> | <b>F (1, 16) = 52.21, p = .000, <math>\eta^2_p = .77</math></b> | F (1, 16) = 0.06, p = .809, $\eta^2_p = .00$ | F (1, 16) = 0.01, p = .927, $\eta^2_p = .00$                   |
|              | Beta ERS                  | <b>F (1, 21) = 5.44, p = .030, <math>\eta^2_p = .21</math></b> | F (1, 21) = 2.46, p = .132, $\eta^2_p = .11$                    | F (1, 21) = 0.25, p = .621, $\eta^2_p = .01$ | F (1, 21) = 1.24, p = .278, $\eta^2_p = .06$                   |
| <i>fNIRS</i> |                           |                                                                |                                                                 |                                              |                                                                |
|              | $\Delta\text{HbO}_2$ peak | <b>F (1, 36) = 5.93, p = .020, <math>\eta^2_p = .14</math></b> | <b>F (1, 36) = 1.45, p = .016, <math>\eta^2_p = .15</math></b>  | F (1, 36) = 2.98, p = .093, $\eta^2_p = .07$ | F (1, 36) = 1.49, p = .231, $\eta^2_p = .04$                   |
| <b>B.</b>    | <b>GROUP x HEMISPHERE</b> | <b>GROUP x HAND</b>                                            | <b>GROUP x CONDITION</b>                                        | <b>HAND x CONDITION</b>                      |                                                                |
| <i>fEEG</i>  |                           |                                                                |                                                                 |                                              |                                                                |
|              | Alpha ERD                 | F (1, 23) = 0.50, p = .828, $\eta^2_p = .02$                   | F (1, 23) = 0.08, p = .776, $\eta^2_p = .00$                    | F (1, 23) = 0.05, p = .828, $\eta^2_p = .06$ | F (1, 23) = 0.23, p = .634, $\eta^2_p = .01$                   |
|              | Beta ERD                  | <b>F (1, 23) = 4.98, p = .036, <math>\eta^2_p = .18</math></b> | F (1, 23) = 0.05, p = .831, $\eta^2_p = .00$                    | F (1, 23) = 0.82, p = .376, $\eta^2_p = .00$ | F (1, 23) = 0.08, p = .786, $\eta^2_p = .00$                   |
|              | Alpha ERS                 | <b>F (1, 16) = 4.53, p = .049, <math>\eta^2_p = .22</math></b> | F (1, 16) = 0.39, p = .539, $\eta^2_p = .02$                    | F (1, 16) = 0.39, p = .541, $\eta^2_p = .02$ | F (1, 16) = 0.15, p = .704, $\eta^2_p = .00$                   |
|              | Beta ERS                  | F (1, 21) = 1.83, p = .191, $\eta^2_p = .08$                   | F (1, 21) = 1.36, p = .257, $\eta^2_p = .06$                    | F (1, 21) = 2.80, p = .109, $\eta^2_p = .12$ | <b>F (1, 21) = 8.80, p = .007, <math>\eta^2_p = .29</math></b> |
| <i>fNIRS</i> |                           |                                                                |                                                                 |                                              |                                                                |
|              | $\Delta\text{HbO}_2$ peak | F (1, 36) = 1.98, p = .168, $\eta^2_p = .05$                   | <b>F (1, 36) = 4.51, p = .041, <math>\eta^2_p = .11</math></b>  | F (1, 36) = 1.52, p = .699, $\eta^2_p = .00$ | F (1, 36) = 2.72, p = .108, $\eta^2_p = .07$                   |
|              | <b>HAND x HEMISPHERE</b>  | <b>HEMISPHERE x CONDITION</b>                                  |                                                                 |                                              |                                                                |
| <i>fEEG</i>  |                           |                                                                |                                                                 |                                              |                                                                |
|              | Alpha ERD                 | F (1, 23) = 1.57, p = .223, $\eta^2_p = .06$                   | F (1, 23) = 0.59, p = .451, $\eta^2_p = .02$                    |                                              |                                                                |
|              | Beta ERD                  | F (1, 23) = 1.04, p = .320, $\eta^2_p = .00$                   | F (1, 23) = 0.07, p = .796, $\eta^2_p = .00$                    |                                              |                                                                |
|              | Alpha ERS                 | <b>F (1, 16) = 6.28, p = .023, <math>\eta^2_p = .28</math></b> | F (1, 16) = 0.11, p = .746, $\eta^2_p = .01$                    |                                              |                                                                |
|              | Beta ERS                  | <b>F (1, 21) = 6.80, p = .020, <math>\eta^2_p = .23</math></b> | F (1, 21) = 0.05, p = .831, $\eta^2_p = .00$                    |                                              |                                                                |
| <i>fNIRS</i> |                           |                                                                |                                                                 |                                              |                                                                |
|              | $\Delta\text{HbO}_2$ peak | F (1, 36) = 0.05, p = .823, $\eta^2_p = .00$                   | F (1, 36) = 0.77, p = .387, $\eta^2_p = .02$                    |                                              |                                                                |

**A.** Effects of Group (Old healthy vs Stroke), Hemisphere (Contralateral vs Ipsilateral) and Hand (Dominant / Non-paretic vs Non-dominant / Paretic) on the fNIRS and fEEG parameters on the paced-reaching task and **B.** Two levels interactions of the model. In bold, results with  $p < .05$  and  $\eta^2_p > .0$
